# Supplementary material for: Ageing-Related Neurodegeneration and Cognitive Decline
Source: MDPI journal article supplement (doi:10.3390/ijms25074065), 2024-04-05
Supplement: s1 [file s1]

Supplement Table S1. Brain regions to be assessed and assessments used

| Sections and stain's needed for assessment of pathological alterations. |    |               |               |            |                  |
|-------------------------------------------------------------------------|----|---------------|---------------|------------|------------------|
| Organ and/or region                                                     | HE | IHC/HP $\tau$ | IHC/A $\beta$ | IHC/pTDP43 | IHC/p $\alpha$ S |
| Gyrus frontalis medius                                                  | X  |               |               | X          | X                |
| Gyrus temporalis superior and medius                                    | X  | X             |               | X          |                  |
| Gyrus cingula                                                           | X  |               |               |            | X                |
| Gyrus parietalis inferior                                               | X  |               | X             |            | X                |
| Gyrus prae- & postcentralis                                             | X  |               |               |            |                  |
| Lobulus occipitalis                                                     | X  | X             |               |            |                  |
| Gyrus hippocampi/parahippocampi, anterior                               | X  | X             | X             |            |                  |
| Gyrus hippocampi/parahippocampi, posterior                              | X  |               |               | X          |                  |
| Hypothalamus & amygdala & nucleus Meynert                               | X  | X             | X             | X          | X                |
| Striatum                                                                | X  |               |               |            |                  |
| Thalamus & nucleus subthalami                                           | X  |               |               |            |                  |
| Mesencephalon with substantia nigra                                     | X  |               | X             |            | X                |
| Pons with locus coeruleus                                               | X  | X             |               |            |                  |
| Medulla oblongata with nucleus hypoglossus                              | X  |               |               |            | X                |
| Vermis cerebelli & nucleus dentatus                                     | X  |               | X             |            |                  |
| Cortex cerebelli                                                        | X  |               |               |            |                  |

HE, hematoxylin-eosin; IHC, immunohistochemistry; HP $\tau$ , hyperphosphorylated  $\tau$ ; A $\beta$ ,  $\beta$ -amyloid; pTDP43, phosphorylated transactive DNA binding protein 43; p $\alpha$ S, phosphorylated  $\alpha$ -synuclein.

Supplement Table S2. Immunohistochemistry

| Antibody                                   | Clone | Source            | Dilution | Pre-treatment                                  |
|--------------------------------------------|-------|-------------------|----------|------------------------------------------------|
| Hyperphosphorylated $\tau$ (HP $\tau$ )    | AT8   | Thermo Scientific | 1:500    | -                                              |
| $\beta$ amyloid (A $\beta$ )               | 6F/3D | Dako              | 1:100    | 80% Formic Acid, 6 hours                       |
| $\alpha$ synuclein ( $\alpha$ S)           | KM51  | NovoCastra        | 1:100    | Citrate Buffer pH 6.0* & 80% Formic Acid, 5min |
| transactive DNA binding protein 43 (TDP43) | 11-9  | Cosmo Bio         | 1:5000   | Citrate Buffer pH 6.0*                         |

\* autoclave
